# Supplementary material
Source: PubMed Central journal article supplement (PMC10103898)
Supplement: NIHMS1859312-supplement-Supplementary_Material.pdf [file NIHMS1859312-supplement-Supplementary_Material.pdf]

## Electronic Supplementary Material

# Optical control of neuronal activities with photoswitchable nanovesicles

Hejian Xiong<sup>1</sup>, Kevin A. Alberto<sup>2</sup>, Jonghae Youn<sup>1</sup>, Jaume Taura<sup>3</sup>, Johannes Morstein<sup>4</sup>, Xiuying Li<sup>1</sup>, Yang Wang<sup>1</sup>, Dirk Trauner<sup>4</sup>, Paul A. Slesinger<sup>3</sup> (✉), Steven O. Nielsen<sup>2</sup> (✉), and Zhenpeng Qin<sup>1,5,6,7</sup> (✉)

<sup>1</sup> Department of Mechanical Engineering, The University of Texas at Dallas, Richardson, TX 75080, USA

<sup>2</sup> Department of Chemistry and Biochemistry, The University of Texas at Dallas, Richardson, TX 75080, USA

<sup>3</sup> Nash Family Department of Neuroscience, Icahn School of Medicine at Mount Sinai, New York, NY 10029, USA

<sup>4</sup> Department of Chemistry, New York University, New York, NY 10012, USA

<sup>5</sup> Department of Bioengineering, The University of Texas at Dallas, Richardson, TX 75080, USA

<sup>6</sup> Department of Surgery, The University of Texas at Southwestern Medical Center, Dallas, TX 75080, USA

<sup>7</sup> Center for Advanced Pain Studies, The University of Texas at Dallas, Richardson, TX 75080, USA

Supporting information to <https://doi.org/10.1007/s12274-022-4853-x>

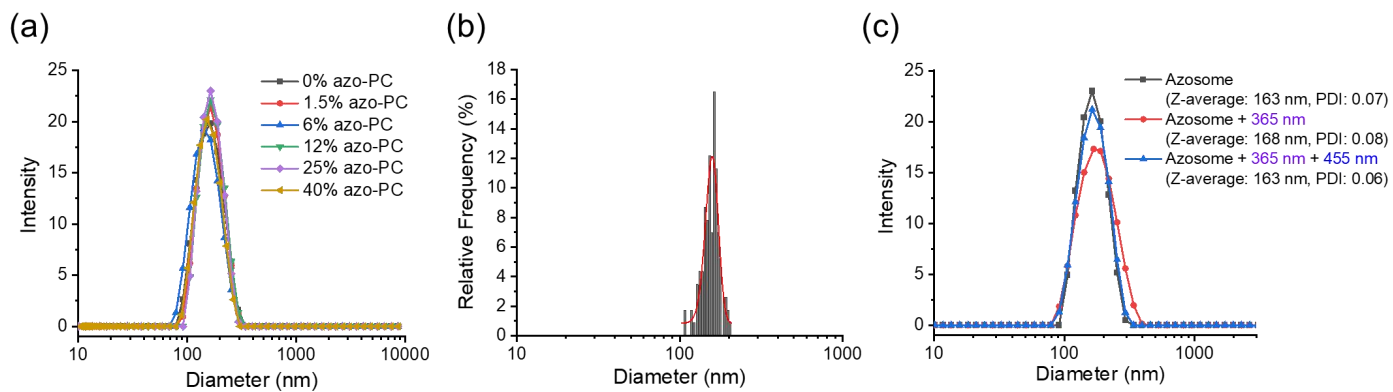

**Figure S1** (a) The size distribution of azosomes with different percentages of azo-PC. (b) Size distribution of azosomes measured by Cryo-TEM ( $n=100$  counts). Red line refers to the Gaussian fit. (c) The change of size distribution of azosomes before and after the 365 and 455 nm light irradiation (azo-PC: 25%, 30 s, 25 mW/cm<sup>2</sup>).

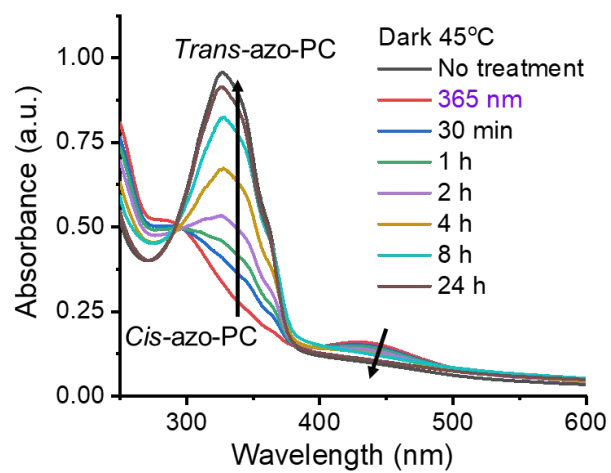

**Figure S2** UV-Vis spectra change of azosomes in the dark at 45°C. 365 nm light irradiation (25 mW/cm<sup>2</sup>, 60 s) was delivered to azosomes to switch *trans*-azo-PC to *cis*-azo-PC at 0 min.

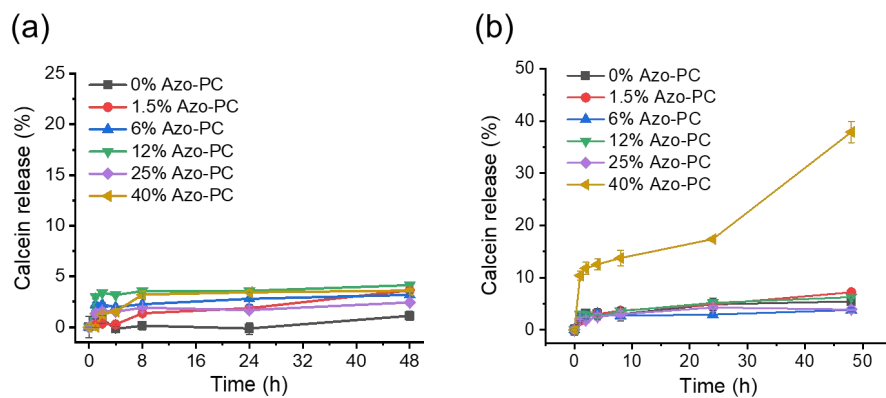

**Figure S3** Plots of calcein release over time. The calcein leakage from azosomes shown with different percentages of azo-PC at two different temperatures (a) 22°C and (b) 37 °C in 0.01 M PBS. Data are expressed as Mean  $\pm$  S.D.

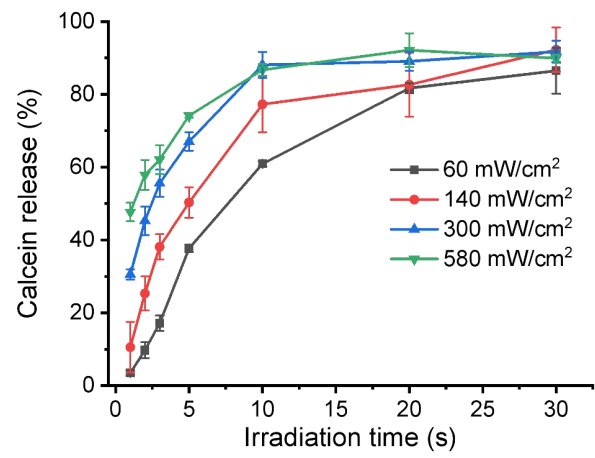

**Figure S4** Calcein release efficiency plotted as a function of irradiation time at different light (405 nm) intensities. Azo-PC: 12%. Data are expressed as Mean  $\pm$  S.D.

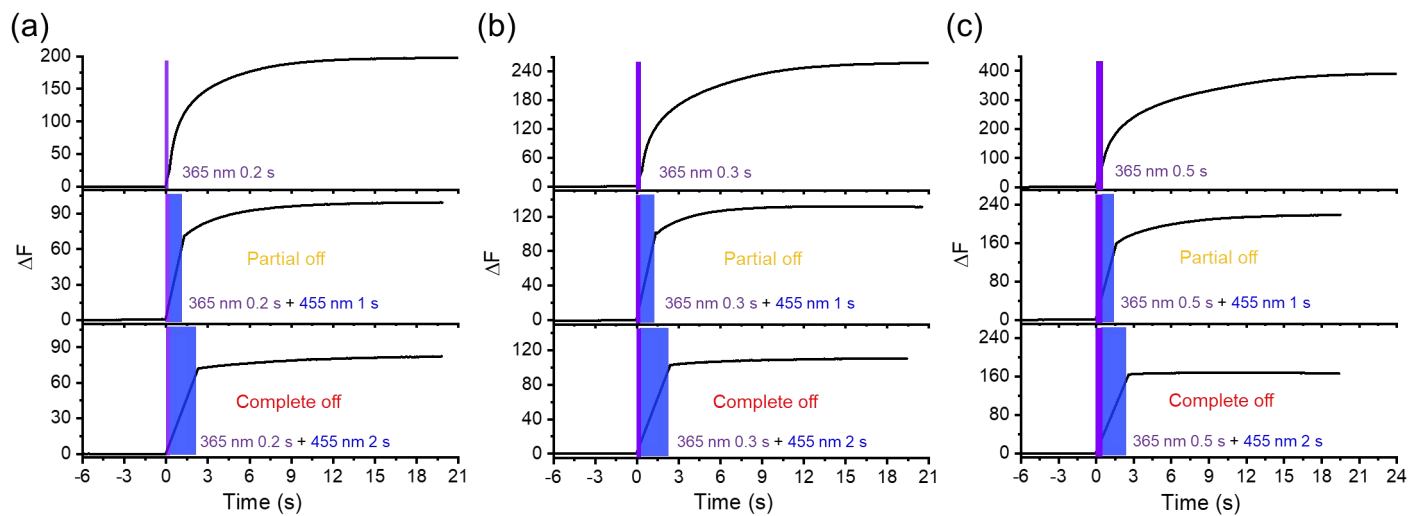

**Figure S5** Real-time fluorescence intensity of calcein-azosome ( $\Delta F$ ) plotted over time under the single irradiation of 365 nm and 455 nm light ( $40 \text{ mW/cm}^2$ ). The durations of 365 nm irradiation were 0.2 s, 0.3 s and 0.5 s in (a), (b) and (c), respectively.

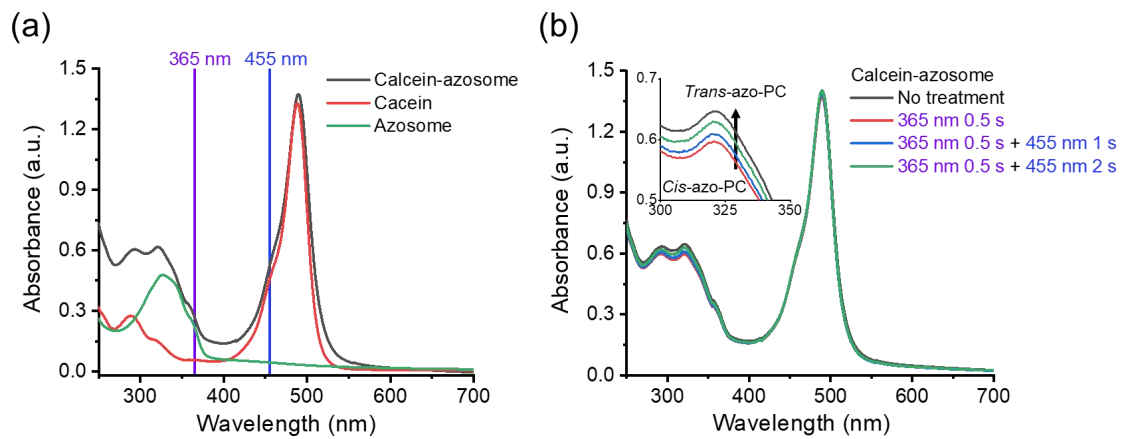

Figure S6 (a) UV-Vis spectra of calcein-azosome, calcein and azosome. (b) UV-Vis spectra of calcein-azosome under different treatments. Sequential irradiation of 365 nm and 455 nm light ( $40 \text{ mW/cm}^2$ ) was performed.

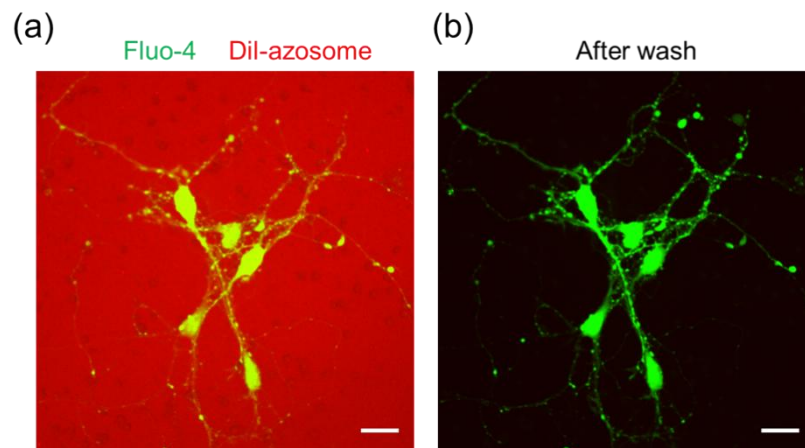

**Figure S7** (a) Confocal images of live mouse primary neurons incubated with Dil-azosome (red) for 1 h. Neurons were labelled by Fluo-4 (green). The concentration of azosome was 10-fold higher than that in the neuromodulation experiments. (b) Confocal images of live mouse primary neurons after wash. Little or no fluorescence of Dil-azosomes (red) was detected after wash, suggesting that azosomes were not endocytosed by the neurons during the incubation. Scale bar: 20  $\mu\text{m}$ .



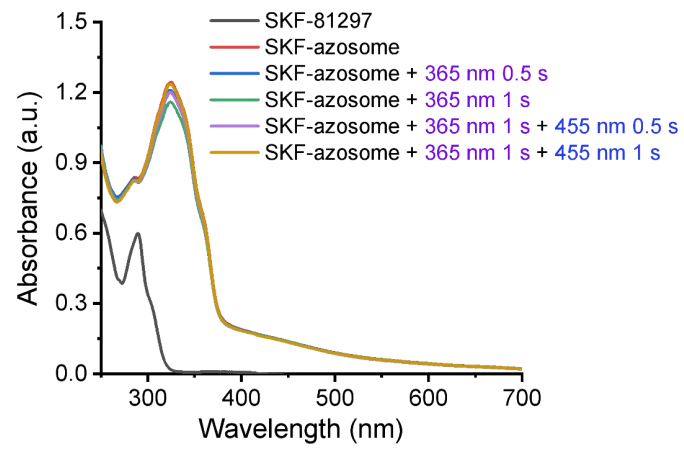

**Figure S8** UV-Vis spectra change of SKF-azosome under different treatments (25 mW/cm<sup>2</sup> for 365 nm and 455 nm light).

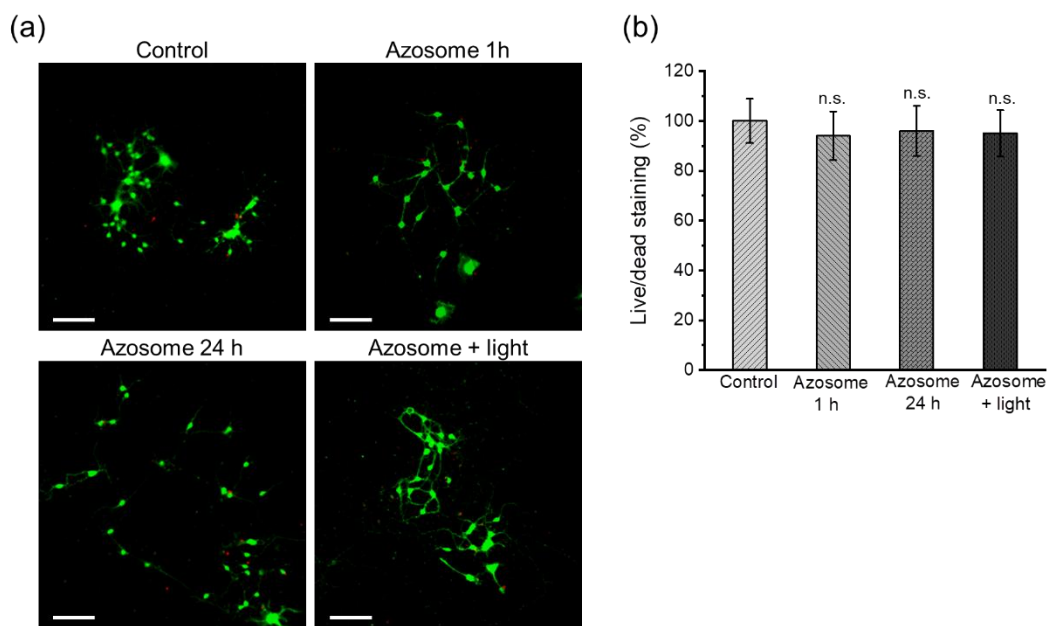

**Figure S9** *In vitro* cytotoxicity of azosome. (a) Confocal images of mouse primary neurons stained by calcein (green) and PI (red). Scale bar: 100  $\mu\text{m}$ . (b) The fluorescence intensity ratio of calcein and PI measured with a plate reader after different treatments (light: 365 nm 2s + 455 nm 2 s, 40  $\text{mW}/\text{cm}^2$ ). No significant difference was found between the control group and azosome-treated groups by two-sample Student's t-test.
